# Supplementary material
Source: ML conference proceedings conference paper supplement (https://proceedings.mlr.press/v151/wu22a.html)
Supplement: Supplementary file 1 [file wu22a-supp.zip]

Archive with 1 entries (1 files):
- Supp.pdf
